# Supplementary material for: Growth of hollow-structured LiMn2O4crystals starting from Mn metal in molten KCl through the microscale Kirkendall effect
Source: Royal Society of Chemistry journal article supplement (doi:10.1039/c5ce02547h), 2016-01-01
Supplement: c5ce02547h2.pdf [file c5ce02547h2.pdf]

Supporting information

Figure S1.

TG-DTA profiles of mixed powders of Mn, LiOH·H<sub>2</sub>O, and fluxes under heating rate of 15 °C/min: (a) flux free, (b) KCl, (c) KOH, and (d) KNO<sub>3</sub>.

Figure S2.

Cross-sectional SEM-EDS mapping images of FIB-milled LiMn<sub>2</sub>O<sub>4</sub> dot array.

Figure S3.

XRD profiles of Mn microstructures directly deposited on Pt substrates after heating at 500 °C for (a) 10 h and (b) 20 h under O<sub>2</sub> flow atmosphere.

Figure S4.

(a) Cross-sectional SEM-EDS mapping images of the Ni/Co/Mn stacked microstructures. (b) XRD profiles of the Ni/Co/Mn stacked microstructures after the flux growth in molten KCl at 900 °C for 1 h under air atmosphere (top layer), LiNi<sub>1/3</sub>Co<sub>1/3</sub>Mn<sub>1/3</sub>O<sub>2</sub> (PDF 56-0147, middle layer), and LiMn<sub>2</sub>O<sub>4</sub> (PDF 70-8342, bottom layer).
