# Supplementary figures and images for: Growth of hollow-structured LiMn2O4crystals starting from Mn metal in molten KCl through the microscale Kirkendall effect
Source: Royal Society of Chemistry journal article supplement (doi:10.1039/c5ce02547h), 2016-01-01

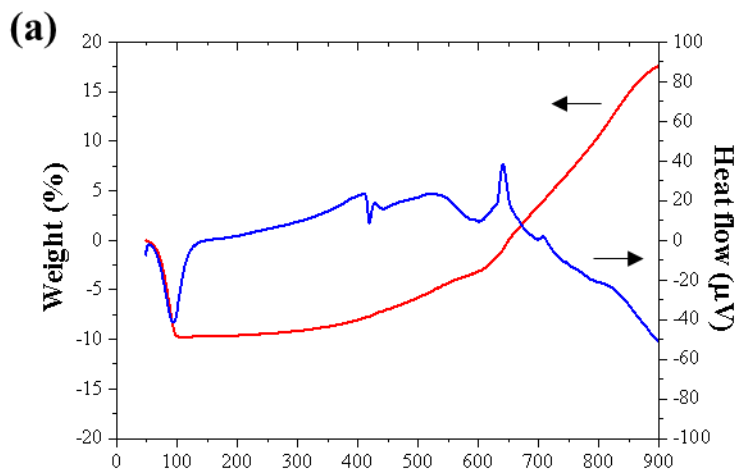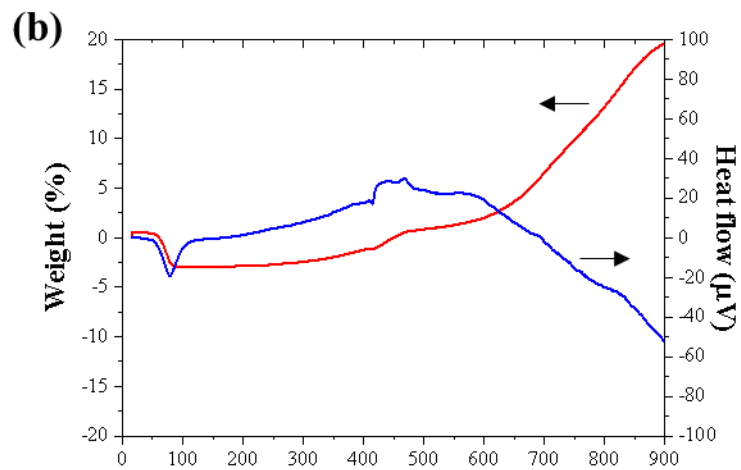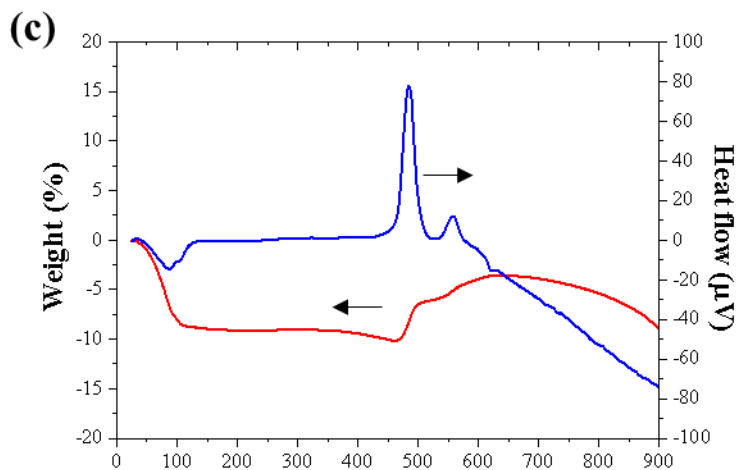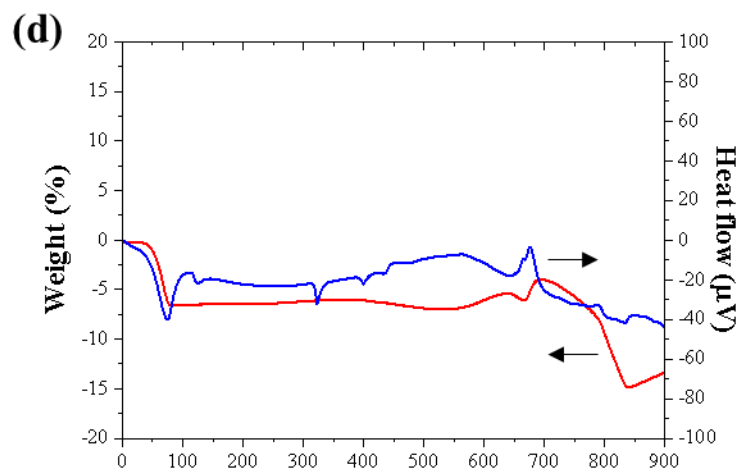

Fig.S2

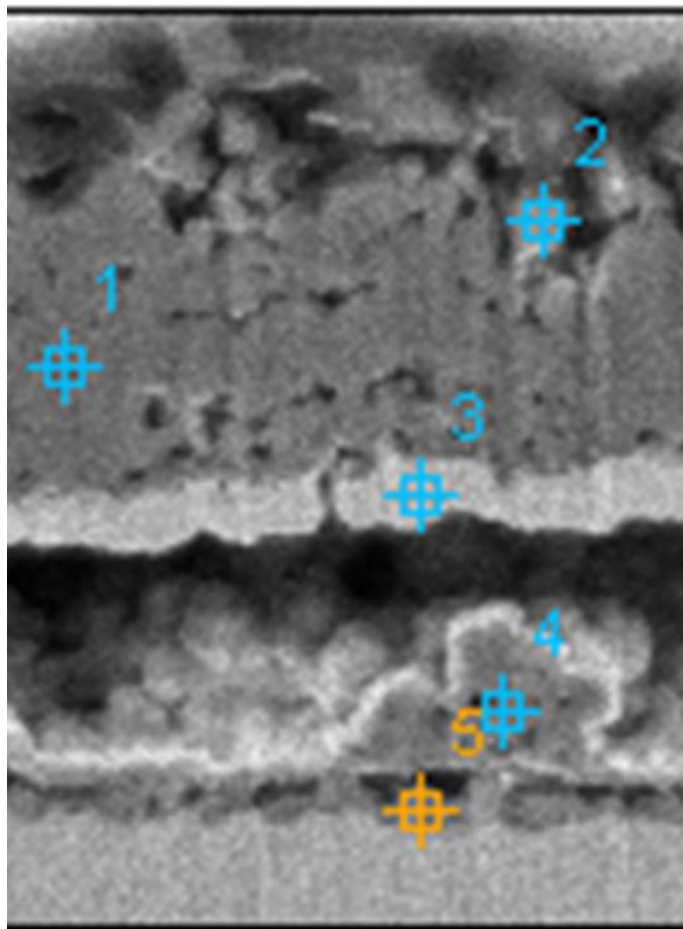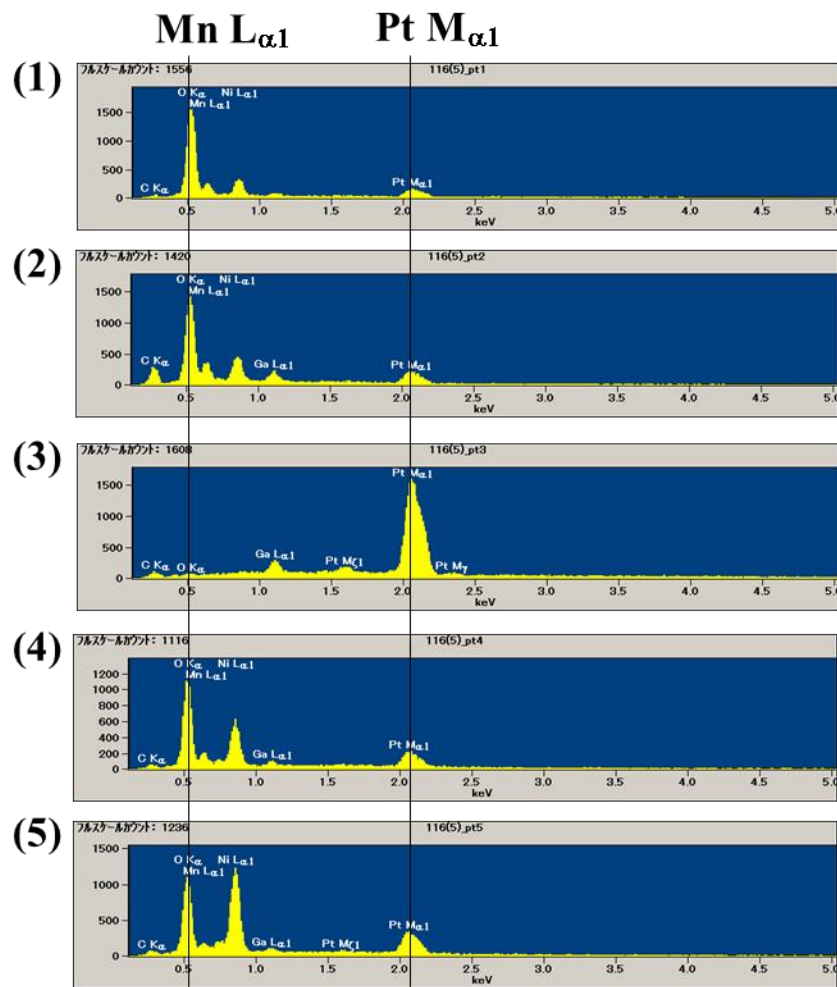

Fig.S3

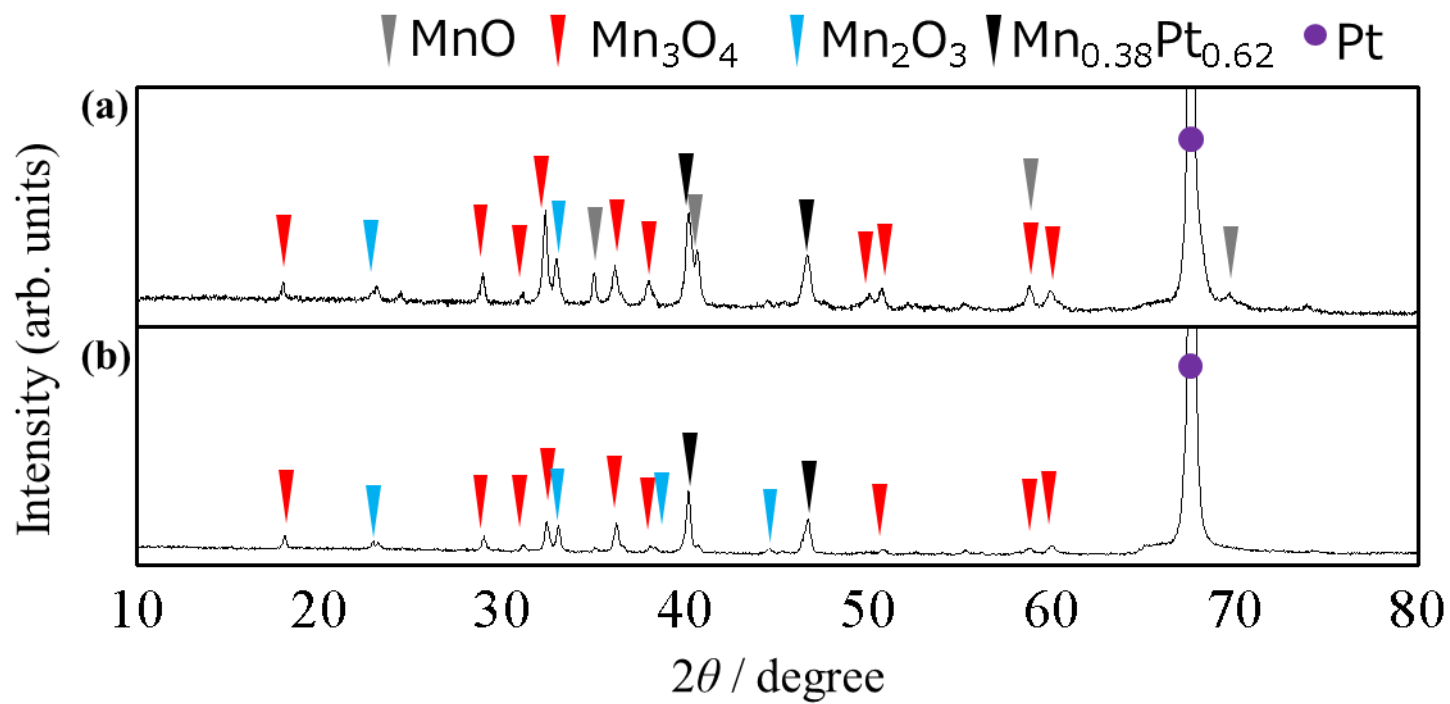

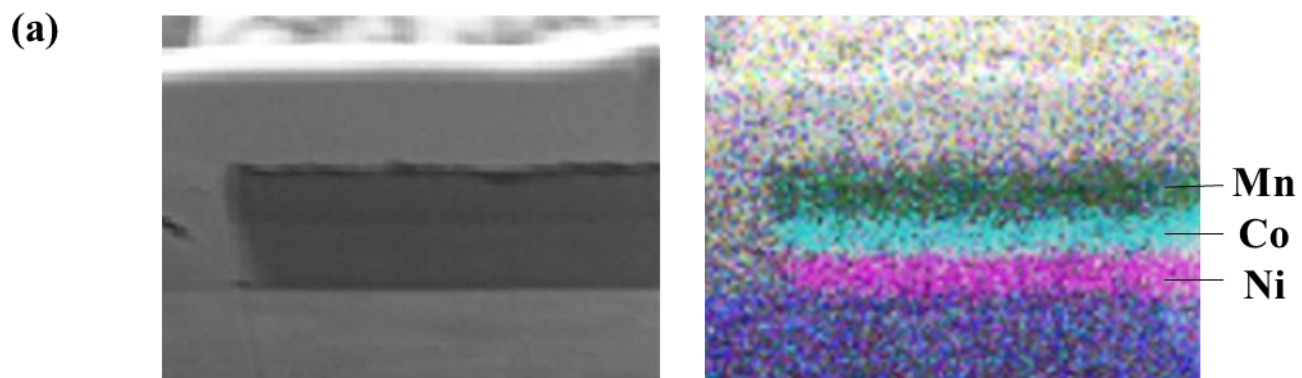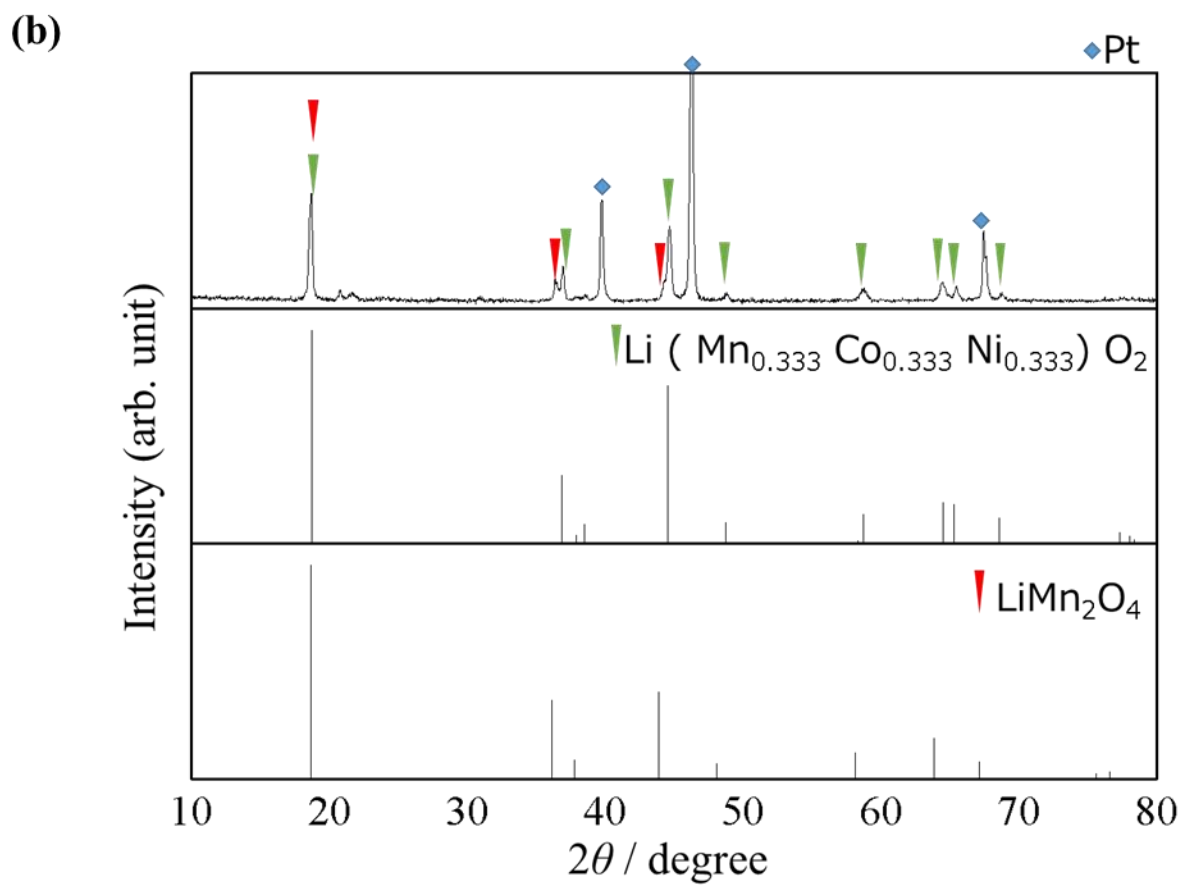

Supplement: c5ce02547h1.pdf [file c5ce02547h1.pdf]
